# Supplementary material for: Hierarchically porous hybrids of polyaniline nanoparticles anchored on reduced graphene oxide sheets as counter electrodes for dye-sensitized solar cells
Source: Royal Society of Chemistry journal article supplement (doi:10.1039/c2ta01000c), 2013-01-01
Supplement: c2ta01000c.pdf [file c2ta01000c.pdf]

**Electronic supplementary information for**

**Hierarchically porous hybrids of polyaniline nanoparticles anchored on  
reduced graphene oxide sheets as counter electrode for dye-sensitized  
solar cells**

**Weiwei Sun,<sup>‡</sup> <sup>a</sup> Tao Peng,<sup>‡</sup> <sup>a</sup> Yumin Liu, <sup>a</sup> Sheng Xu, <sup>a</sup> Jikang Yuan, <sup>b</sup> Shishang Guo <sup>a,\*</sup> and Xing-Zhong Zhao <sup>a,\*</sup>**

<sup>a</sup> School of Physics and Technology and Key Laboratory of Artificial Micro- and Nano-structure of Ministry of Education, Wuhan University, Wuhan, 430072, China. E-mail: xzzhao@whu.edu.cn ; gssyhx@whu.edu.cn;

<sup>b</sup> Department of Applied Physics, The Hong Kong Polytechnic University, Hong Kong, China.

<sup>‡</sup> These authors contributed equally to the work.

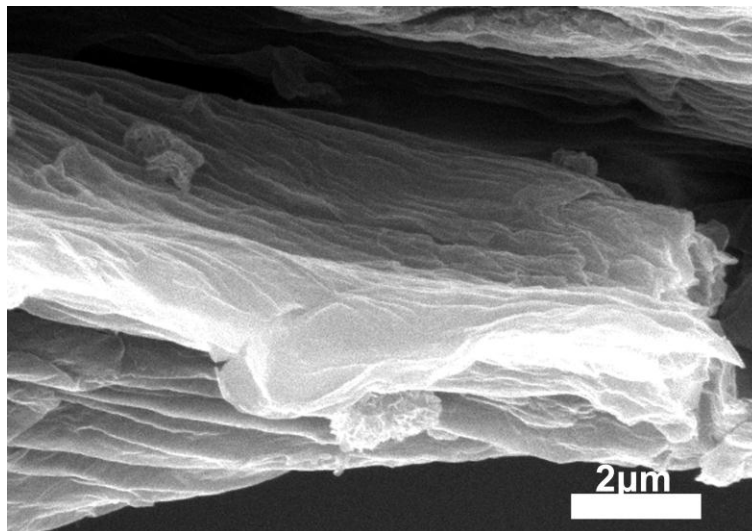

**Figure. S1** Tilted view of SEM image of MnO<sub>2</sub>/rGO hybrid with LBL structure.

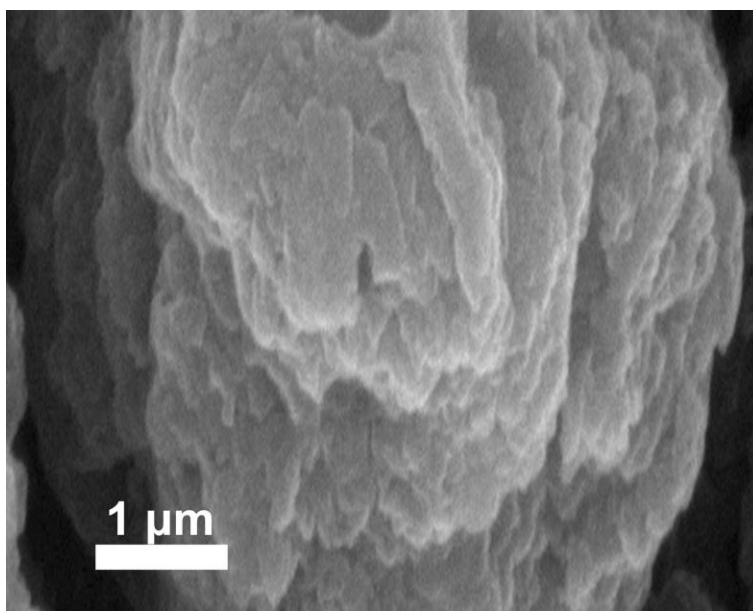

**Figure. S2** Top view of SEM image of M-PANI/rGO hybrid with LBL structure.
